# Supplementary material for: Crucial Role of the Accessory Genome in the Evolutionary Trajectory of Acinetobacter baumannii Global Clone 1
Source: Front Microbiol. 2020 Mar 18;11:342. doi: 10.3389/fmicb.2020.00342 (PMC7093585; doi:10.3389/fmicb.2020.00342)
Supplement: Supplementary file 5 [file Table_3.XLSX]

## Sheet: Hoja1
Supplementary Table 3. Genes related to antimicrobial resistance in GC1 Group 1 and Outgroup Group 3 strains under study.
ST	Strain	Multidrug resistance													β-lactams													Rifampicin		Fluoroquinolones			Aminoglycosides	Sulphonamides		Tetracyclines	Phenicols		Trimethoprim	MLS	Integrons
		ARG																																							Integrase genes
		RND Efflux pumps
		AdeABC					AdeFGH				AdeIJK
		adeA	adeB	adeC	adeR	adeS	adeF	adeG	adeH	adeL	adeI	adeJ	adeK	adeN	blaOXA-51-like	ampC allele	IS linked to ampC	blaTEM	blaTEM-1 promoter	blaOXA-10	blaOXA-20	blaOXA-23	blaOXA-235	blaVEB-1	blaGES	blaPER-7	blaNDM-1	rpoB	arr-2	GyrA81 (Ser-83 E. coli)	ParC84 (Ser-84 E. coli)	ParC88 (Glu-88 E. coli)	Variety	sul1	sul2	tet	catA1	cml	dfr	mph(E), msr(E)	intI1	intI2
GC1/ST231	A144*	+	+ 99,97% b	+ 99,93% c	+	+	+ 98.43%	+	+	+	+	+	+	+ 98.17%	blaOXA-69	≈1g	-	1	Pa/Pb	-	-	-	-	-	-	-	-	2 +	-	L	L	E	aac(6')-Ib3, Δ aac(3)-IIa n, aph(3')-Ia	+	-	2 tet(A)	+	-	-	-	+	-
	A155*	+	+ 99,97% b	+ 99,93% c	+	+	+ 98.43%	+	+	+	+	+	+	+ 98.17%	blaOXA-69	≈1g	-	1	Pa/Pb	-	-	-	-	-	-	-	-	+	-	L	L	E	aac(6')-Ib3, Δ aac(3)-IIa n, aph(3')-Ia	+	-	tet(A)	-	-	-	-	+	-
	AYE	+	+	+	+	+	+ 98.43%	+	+	+	+	+	+	+ 98.32%	blaOXA-69	1	ISAba1	-	-	+	-	-	-	+	-	-	-	+	+	L	L	E	aph(3')-Ia,	+	-	tet(A), tet(G)	+ 99.85%	A5, A9	A1, A10	-	+ 4 (Δ2) p	-
																																	aacC1, aac(6’)-VI, aadA1, aadB, strAB
	D36	+	0.999	+	+	0.9991	+ 98.43%	+	+	+	+	+ 99.97%	+ 99.93%	+ 98.32%	blaOXA-69	17	ISAba1	-	-	-	-	+	-	-	-	-	-	G102D	-	L	L	E	aadB, aphA1a	-	+	-	-	-	-	-	-	-
	A1	+	+	+	+	+	+ 98.43%	+	+	+	+	+	+	+ 98.32%	blaOXA-69	1	-	-	-	-	-	-	-	-	-	-	-	+	-	S	S	E	aac(3)-I, aadA1	2 +	-	tet(A)	+ 99.85%	-	-	-	+	-
	AB307-0294	+	+	+	+ 99.87%	+ 99.91%	+ 98.43%	+	+	+	+	+	+ 99.93%	+ 98.32%	blaOXA-69	1	-	-	-	-	-	-	-	-	-	-	-	+	-	L	S	E	-	-	-	-	-	-	-	-	-	-
	AB5075-UW	+	+	+	+	+	+ 98.43%	+	+	+	+	+	+	+ 98.32%	blaOXA-69	1	-	-	-	-	-	+	-	-	+	-	-	+	-	L	L	E	aphA6, aadA2, aac(6’)-Ib, aadB, strAB	+	-	-	-	A5	A7	-	-	-
	AB0057	+	+	+	+	+	+ 98.43%	+	+	+	+	+	+	+ 98.32%	blaOXA-69	8	-	19-like (A806G)	P4	-	-	+	-	-	-	-	-	+	-	L	L	E	aph(3')-Ia, aac(3)-I, aadA1	2 +	-	tet(A)	+ 99.85%	-	-	-	+ Δ p	-
	USA15	+	+	+	+	+	+ 97.22%	+ 97.99%	+ 99.29%	+ 99.41%	+	+	+	+ 98.32%	blaOXA-69	8	-	-	-	-	-	+	-	-	-	-	-	+	-	L	L	E	-	+	-	-	-	-	-	-	-	-
	A85	+	+	+	+	+	+ 97.22%	+ 97.99%	+ 99.29%	+ 99.41%	+	+	+	+ 98.32%	blaOXA-69	1, 8	-, ISAba1	19-like (A806G)	P4	-	-	+	-	-	-	-	-	+	-	L	L	E	aph(3')-Ia, aac(3)-I,	2 +	-	tet(A)	+ 99.85%	-	-	-	+ Δ p	-
																																	aadA1
	A388	+	+ 99.97%	+	+ 99.87%	+ 99.91%	+ 97.22%	+ 97.99%	+ 99.29%	+ 99.41%	+	+	+	+ 98.32%	blaOXA-92	7	ISAba125	19-like (A806G)	P4	-	-	-	-	-	-	-	-	+	-	S	S	E	aph(3’)-VIa, aadA1, aac(3),	2 +	-	tet(A)	+ 99.85%	-	-	-	+	-
																																	aac(6’)--Ib3,
																																	aph(3')-Ia
	AR_0083	+	+	+	+	+	+ 97.22%	+ 97.99%	+ 99.29%	+ 99.41%	+	+	+	+ 98.32%	blaOXA-69	≈ 78h	ISAba1	-	-	-	-	3 +	-	-	-	+	+	+	+	L	S	E	3 aadA1, aac(3), aph(3')-Ia, 2 aph(6)-Id, aph(3''), armA	3 +	3	-	-	A199.13%	2 A1	+, +	+ Δ 2 p, q	+2
	DA33382	+	+	+	+	+ 99.91%	+ 97.22%	+ 97.99%	+ 99.29%	+ 99.41%	+	+	+	+ 98.32%	blaOXA-69	73	ISAba1	-	-	-	-	-	-	-	-	-	-	+	-	L	L	E	aadA1, aac(3),	+	-	-	-	-	-	-	+ Δ p	-
																																	aph(3')-Ia
	9102	+ Δ	+	+	-	-	+ 97.22%	+ 97.99%	+ 99.29%	+ 99.41%	+	+	+	+ 98.32%	blaOXA-69	≈ 50i	ISAba1	-	-	-	-	-	5 +	-	-	-	-	H535Q	-	L	S	K	aph(3'), aph(6)-Id	-	+	-	-	-	-	-	-	-
	11W359501	+	+	+	+	+	+ 97.22%	+ 97.99%	+ 99.29%	+ 99.31%	+	+	+	+ 98.32%	blaOXA-69	≈ 5j	ISAba1	-	-	-	-	-	-	-	-	-	-	+	-	L	A	E	aac(3)-Ia, aadA1	+	-	tet(A)	-	-	-	-	+ Δ p	-
	NCTC13421	+	+	+	+	+ 99.82%	+ 97.22%	+ 97.99%	+ 99.29%	+ 99.41%	+	+	+	+ 98.32%	blaOXA-69	1, 8	-, ISAba1	19-like (A1005G)	P4	-	-	2 +	-	-	-	-	-	+	-	L	L	E	aadA1, aac(3)-I, aph(3')-Ia	2 +	-	tet(A)	+ 99.85%	-	-	-	+ Δ p	-
	NIPH 527	+	+ 99.97%	+	+	+	+ 97.22%	+ 97.99%	+ 99.29%	+ 99.41%	+	+	+	+ 98.32%	blaOXA-69	1	-	19-like (A920G)	P4	-	-	-	-	-	-	-	-	+	-	S	S	E	aph(3')-Ia,	+Δo	+	tet(A)	+ 99.85%	-	A5	-	+	-
																																	aadB, strAB
	NIPH 290	+	+	+	+ 99.87%	+	+ 97.22%	+ 97.99%	+ 99.29%	+ 99.41%	+	+	+	+ 98.32%	blaOXA-69	1	-	19-like (A920G)	P4	-	-	-	-	-	-	-	-	+	-	L	L	-	3 aph(3')-VIa, aac(3)-I, aadA1,	2 +	-	tet(A)	+ 99.85%	-	-	-	+	-
																																	aadB
GC2/ST437	ACICU	+ 97.67%	+ 97.88%	+ 95.46%	+ 98.12%	+ Δ 96.71% e	+ 98.13%	+	+	+	+ 99.44%	+ 99.69%	+ 98.63%	+ 99.08%	blaOXA-66	≈62k	ISAba125	-	-	-	+	-	-	-	-	-	-	+	-	L	S	E	aac(6')-Ib3	+	-	-	-	-	-	-	+	-
GC3/ST928	Naval-13	-	-	-	-	- f	-	-	-	-	-	-	-	-	blaOXA-71	≈41l	-	-	-	-	-	-	-	-	-	-	-	-	-	-	-	-	-	-	-	-	-	-	-	-	-	-
CC113/ST962	AB33405	-	-	-	-	- f	0.9748	+	+	+	+ 99.60%	+ 99.56%	+ 98.97%	+ 98.17%	blaOXA-65	≈54m	ISAba1	1-like (T18C, T227C, T395G)	P3	-	-	+	-	-	-	-	-	H535N, L542F	-	L	Y	E	aadA1	-	-	-	-	-	A1	-	-	+
ST404/a	A118a	-	-	-	-	- f	-	-	-	-	-	-	-	-	blaOXA-715	≈41l	-	-	-	-	-	-	-	-	-	-	-	-	-	-	-	-	-	-	-	-	-	-	-	-	-	-
ST437/ST112	ATCC 17978	+ 98.33%	+ 97.88%	- e	+ 98.79%	+ 96.87% e	+ 98.21%	+	+	+	+ 99.60%	+ 99.28%	+ 98.63%	+	blaOXA-95	56	-	-	-	-	-	-	-	-	-	-	-	V604I	-	S	S	E	-	-	2 +	-	-	-	-	-	-	-
a The sequence type (ST) was not found in Oxford’s MLST database. b A144 and A155 shared the same allele with a NS mutation generating N192K compared to AYE. c A144 and A155 shared the same allele with two NS mutations generating M1L and G423S compared to AYE. d In ATCC 17978, R2091 and CIP70.10, a genomic reduction was observed, that involved at least adeC and the two kb downstream of it. e ACIC…
